# Supplementary material
Source: PubMed Central journal article supplement (PMC9559096)
Supplement: mmc2.pdf [file mmc2.pdf]

Murine Fabp7 promoter search (+/- 2000 b.p. from Transcription Start Site)

| #pattern name           | start | stop | score   | p-value  |
|-------------------------|-------|------|---------|----------|
| Reverb_GTAGGTCACTGGGTCA | 1857  | 1842 | 12.6095 | 1.31E-05 |
| Reverb_GTAGGTCACTGGGTCA | 1772  | 1757 | 10.4419 | 4.08E-05 |
| NFkB-p65-Rel            | 2324  | 2315 | 9.73773 | 6.58E-05 |
| NFkB-p65-Rel            | 671   | 662  | 9.63552 | 6.74E-05 |
| PPAR                    | 1428  | 1415 | 10.5357 | 7.23E-05 |
| RARg_AGGTCAAGGTCA       | 3749  | 3738 | 8.65851 | 9.51E-05 |
| NFkB-p65-Rel            | 2909  | 2918 | 8.51123 | 0.000104 |
| RXR                     | 1415  | 1428 | 9.02144 | 0.000143 |
| RARg_AGGTCAAGGTCA       | 813   | 802  | 7.43131 | 0.000152 |
| Reverb_GTAGGTCACTGGGTCA | 1844  | 1829 | 7.38755 | 0.000171 |
| RORa_ATCAAGGTCA         | 1838  | 1829 | 9.45661 | 0.000202 |
| PPAR                    | 2796  | 2783 | 8.57114 | 0.000218 |
| RARg_AGGTCAAGGTCA       | 1288  | 1299 | 6.40865 | 0.000219 |
| NFkB-p65-Rel            | 1570  | 1561 | 6.46707 | 0.00022  |
| RXR                     | 3520  | 3507 | 8.02635 | 0.000238 |
| RXR                     | 1959  | 1946 | 7.86051 | 0.000258 |
| PPAR                    | 2961  | 2974 | 8.08    | 0.000282 |
| Reverb_GTAGGTCACTGGGTCA | 2598  | 2613 | 6.20523 | 0.000286 |
| NFkB-p65-Rel            | 663   | 672  | 5.34279 | 0.000323 |
| PPAR                    | 1946  | 1959 | 7.68708 | 0.000345 |
| PPAR                    | 2586  | 2599 | 7.68708 | 0.000345 |
| NFkB-p65-Rel            | 2917  | 2908 | 5.13837 | 0.000349 |
| NFkB-p65-Rel            | 927   | 936  | 4.93395 | 0.000373 |
| Reverb_GTAGGTCACTGGGTCA | 1721  | 1706 | 5.51554 | 0.000381 |
| Reverb_GTAGGTCACTGGGTCA | 2254  | 2269 | 5.51554 | 0.000381 |
